# Supplementary material
Source: PubMed Central journal article supplement (PMC6741484)
Supplement: jin-0005-0505-s01.pdf [file jin-0005-0505-s01.pdf]

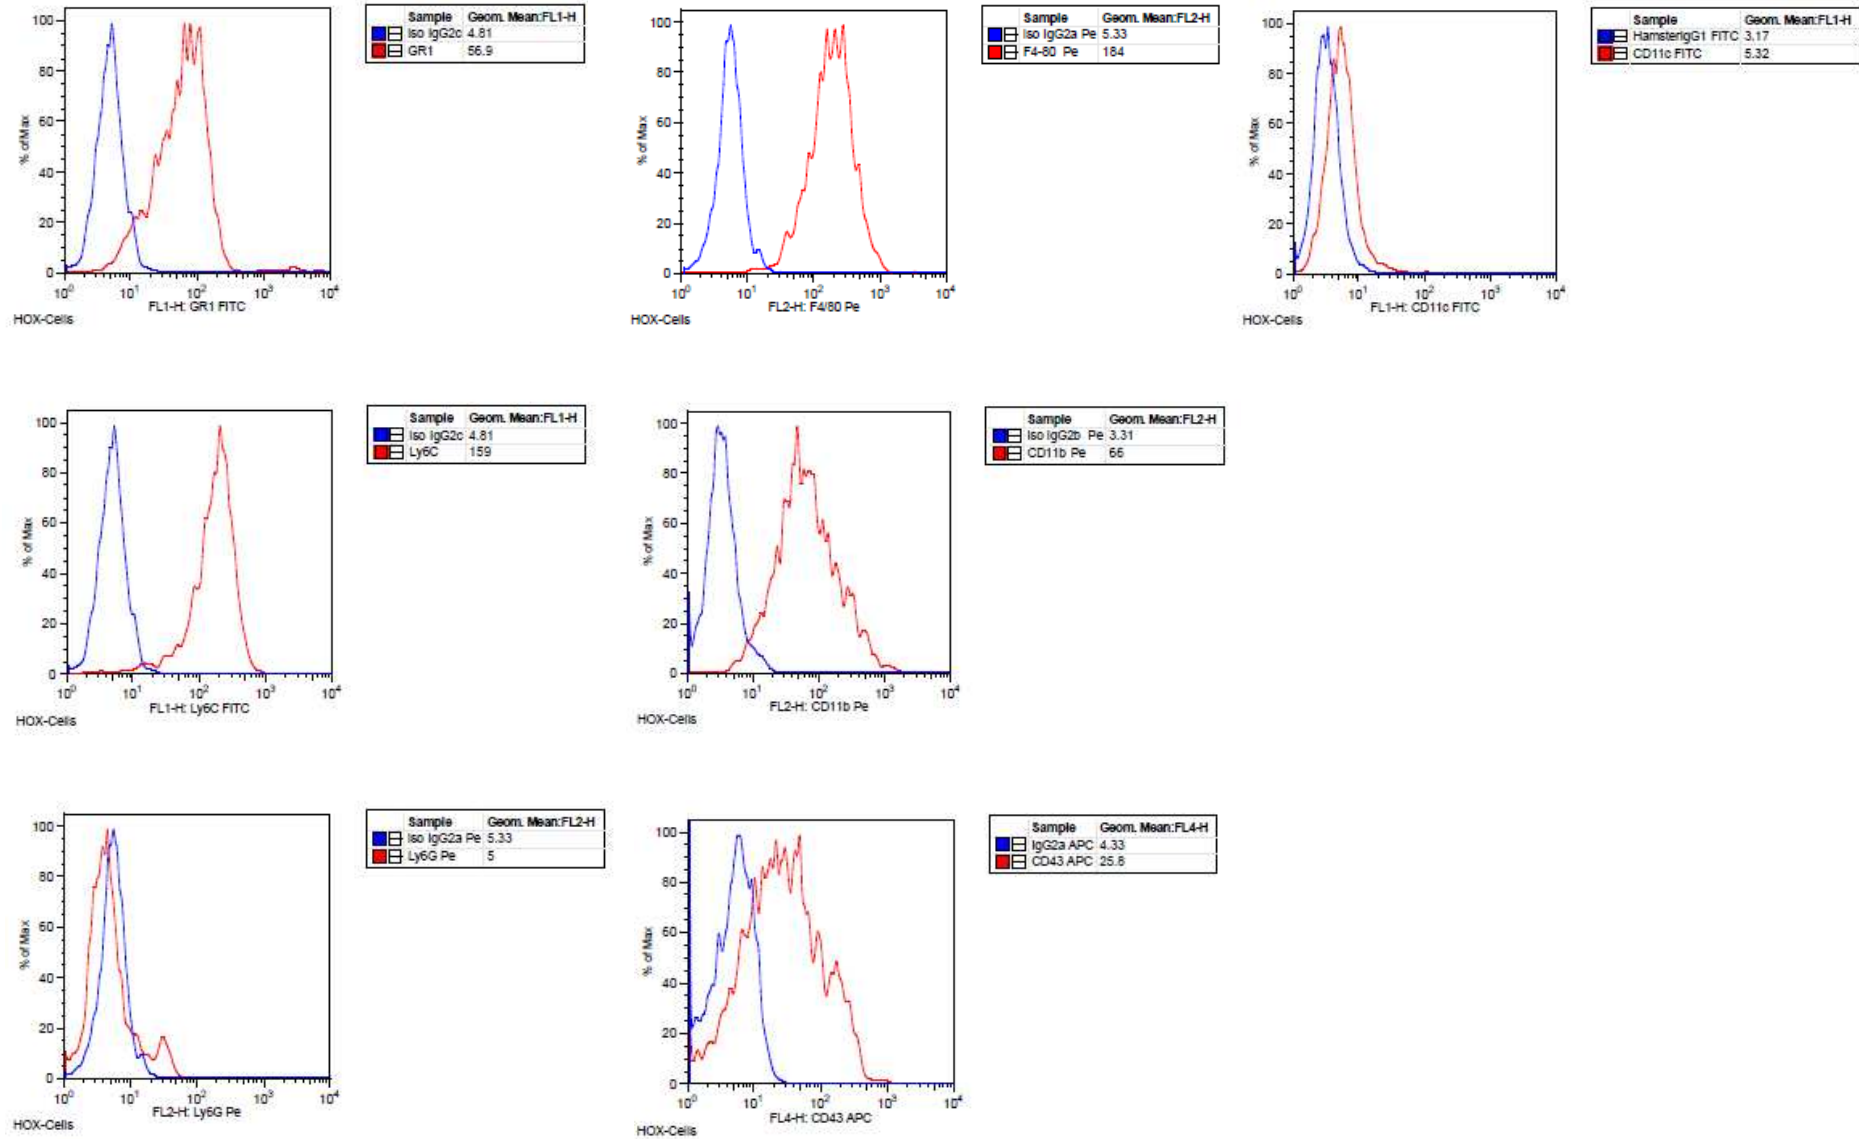

ER-Hoxb8 ROR $\alpha$  ko monocytes were analyzed by flow cytometry for cell type-specific markers. They were positive for murine Monocyte/ macrophage marker GR1, Ly6C, F4/80, CD11b and CD43 but negative for granulocyte marker Ly6G and DC Marker CD11c.
