# Supplementary material
Source: PubMed Central journal article supplement (PMC6741484)
Supplement: jin-0005-0505-s02.pdf [file jin-0005-0505-s02.pdf]

**Friesenhagen et al Supplemental Table I: Primer Sequences used in qRT-PCR experiments**

| <b>Primer name</b> | <b>Sequence</b>                        |
|--------------------|----------------------------------------|
| human CCL8<br>F    | 5'-AGA TGA AGG TTT CTG CAG CGC         |
| human CCL8<br>R    | 5'-TGG AAA CTG AAT CTG GCT GAG         |
| human<br>CXCL9 F   | 5'-GAC CTT AAA CAA TTT GCC CCA AG      |
| human<br>CXCL9 R   | 5'-TCC TTC ACC CCC ATC TGC TGA ATC TGG |
| human<br>CXCL11 F  | 5'-CAG AAT TCC ACT GCC CAA AGG         |
| human<br>CXCL11 R  | 5'-GTA AAC TCC GAT GGT AAC CAG CC      |
| human<br>GAPDH F   | 5'-GCA AAT TTC CAT GGC ACC GT          |
| human<br>GAPDH R   | 5'-GCC CCA CTT GAT TTT GGA GG          |
| human<br>IFNA2 F   | 5'-AAC TCC CCT GAT GAA TGC GG          |
| human<br>IFNA2 R   | 5'-TCT GAC AAC CTC CCA GGC AC          |
| human<br>IFNB1 F   | 5'-TCT GGC ACA ACA GGT AGT AGG C       |
| human<br>IFNB1 R   | 5'-GAG AAG CAC AGG AGA GCA A           |
| mouse<br>CXCL9 F   | 5'- ATT GTG TCT CAG AGA TGG TGC TAA TG |
| mouse<br>CXCL9 R   | 5'- TGA AAT CCC ATG GTC TCG AAA G      |
| mouse<br>CXCL11 F  | 5'- AAA ATG GCA GAG ATC GAG AAA GC     |
| mouse<br>CXCL11 R  | 5'- CAG GCA CCT TTG TCG TTT ATG AG     |
| mouse<br>GAPDH F   | 5'- GTC CAC CAG CCT GTT GCT GTA G      |
| mouse<br>GAPDH R   | 5'- CCC ACT CTT CCA CCT TCG ATG        |
| mouse IFNA2<br>F   | 5'- TCA AAG GAC TCA TCT GCT GCT TG     |
| mouse IFNA2<br>R   | 5'- CCA CCT GCT GCA TCA GAC AAC        |
| mouse IFNB1<br>F   | 5'- GTC ATG GGT TTC TCA TGA AGA ACA G  |
| mouse IFNB1<br>R   | 5'- CAG ACC CCT TCC AGT GAT TCA TC     |
| mouse IL-8R<br>F   | 5'- TTA TCC ACC TTG AAT TCT CCC ATC    |
| mouse IL-8R<br>R   | 5'- AAG CCT TGA GTC ACA GAG AGT TGG    |
| mouse TNF-<br>α F  | 5'- AGA AAC ACA AGA TGC TGG GAC AGT    |
| mouse TNF-<br>α R  | 5'- CCT TTG CAG AAC TCA GGA ATG G      |
